# Supplementary material for: Differential Effects of Hormones on Cellular Metabolism in Keratoconus In Vitro
Source: PubMed Central journal article supplement (PMC5314412; doi:10.1038/srep42896), 2017-02-17
Supplement: srep42896-s1.pdf [file srep42896-s1.pdf]

## Differential Effects of Hormones on Cellular Metabolism in Keratoconus *In Vitro*

*Tina B McKay*<sup>1</sup>, *Jesper Hjortdal*<sup>2</sup>, *Henrik Sejersen*<sup>2</sup>, *Dimitrios Karamichos*<sup>1,3,\*</sup>

<sup>1</sup> *Department of Cell Biology, University of Oklahoma Health Sciences Center, Oklahoma City, OK, 73104, USA*

<sup>2</sup> *Department of Ophthalmology, Aarhus University Hospital, Aarhus C DK-800, Denmark.*

<sup>3</sup> *Department of Ophthalmology/Dean McGee Eye Institute, University of Oklahoma Health Sciences Center, Oklahoma City, OK, 73104, USA*

\* **Corresponding author:** Dimitrios Karamichos, Ph.D., Department of Ophthalmology/Dean McGee Eye Institute, University of Oklahoma Health Sciences Center, Oklahoma City, OK 73104, USA. Tel.: +1 405 271 4019; fax: +1 405 271 8128; e-mail: dimitrios-karamichos@ouhsc.edu

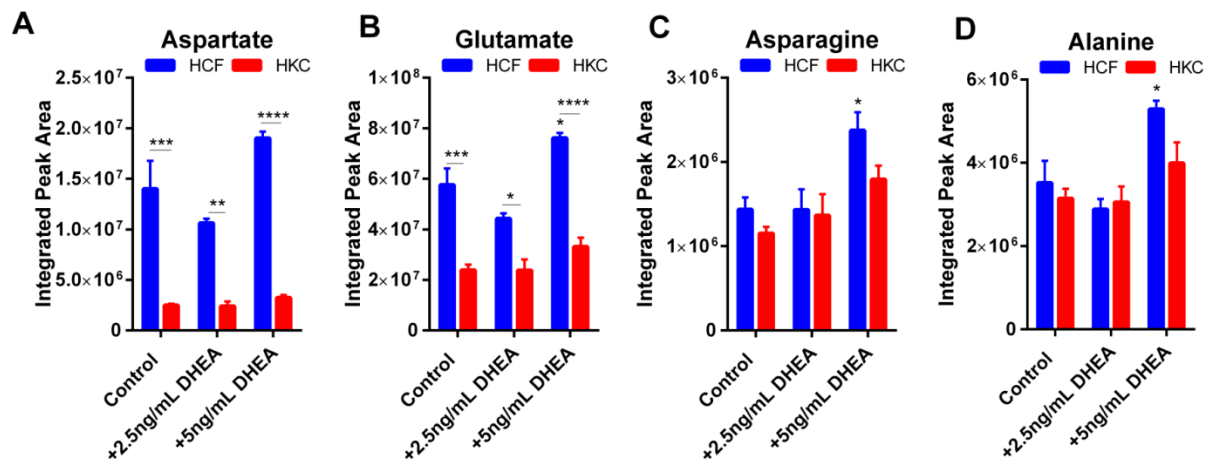

**Supplemental Figure 1.** Amino acid flux in HCFs and HKCs with increasing concentrations of DHEA (2.5ng/mL and 5ng/mL). Glutamate, asparagine, and alanine significantly increase with DHEA treatment (5ng/mL) in HCFs, but not HKCs.

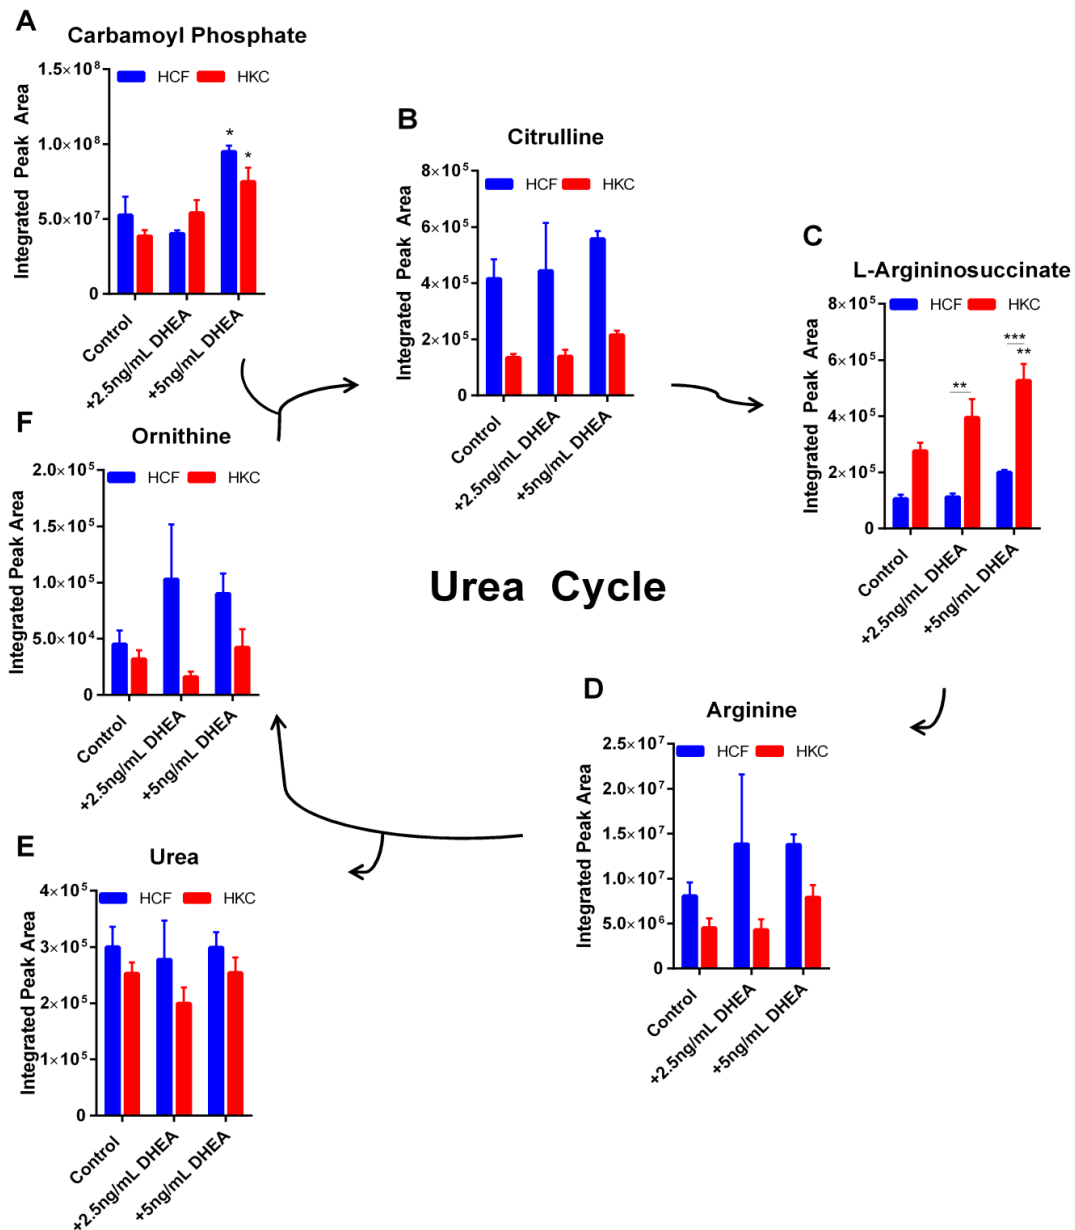

**Supplemental Figure 2.** Increased urea cycle flux with DHEA treatment in both HCFs and HKCs. The urea cycle is a major metabolic regulator of arginine metabolism, which serves as a precursor to proline, the core amino acid that makes up collagen monomers. HKCs showed a substantial reduction in arginine levels untreated with a significant increase in L-argininosuccinate with DHEA treatment (2.5ng/mL and 5ng/mL) in HKCs, but not HCFs.  $n=3$ , error bars represent standard error of the mean. Statistical significance was determined by ANOVA. \* $p \leq 0.05$ , \*\* $p \leq 0.01$ , \*\*\* $p \leq 0.001$ .

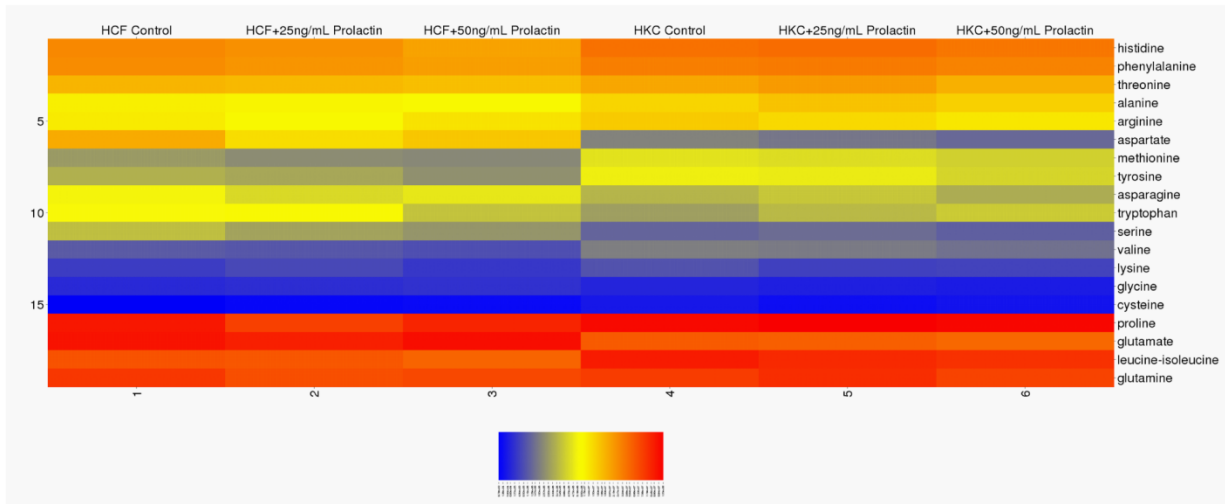

**Supplemental Figure 3.** Heat map of amino acid flux with increasing concentration of prolactin (25ng/mL and 50ng/mL) in HCFs and HKCs. Compared to the effects of DHEA and 17 $\beta$ -estradiol on amino acid flux, prolactin did not significantly modulate protein degradation or assembly.

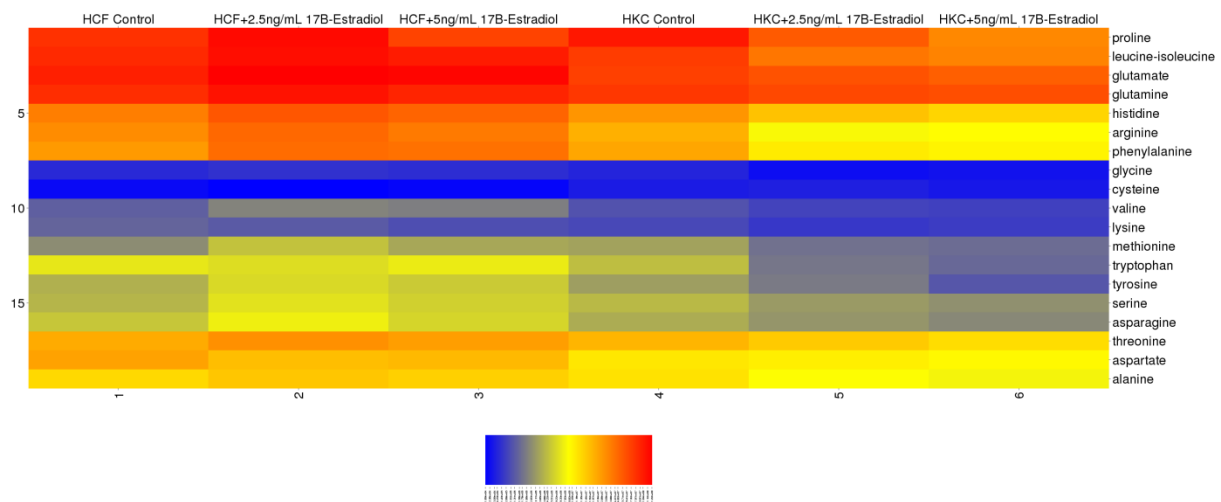

**Supplemental Figure 4.** Heat map of free amino acid flux in HCFs and HKCs with increasing concentrations of 17 $\beta$ -estradiol (2.5ng/mL and 5ng/mL). The blue color indicates metabolites at low concentrations with a transition to yellow and orange representing higher concentrations.

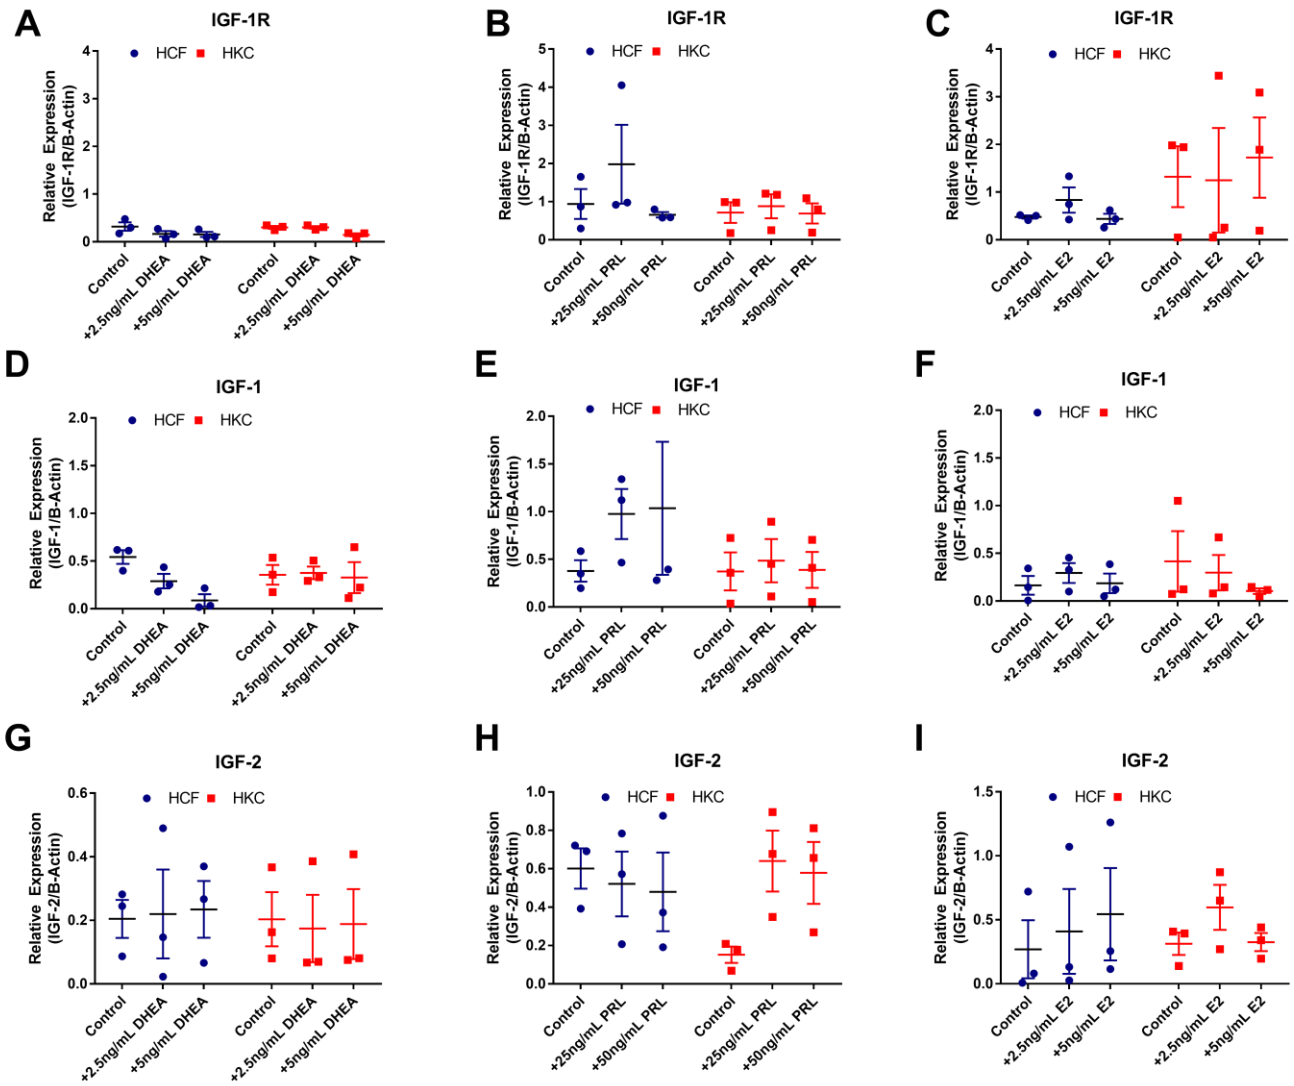

**Supplemental Figure 5.** Relative protein expression of (A-C) IGF-1R, (D-F) IGF-1, and (G-I) IGF-2 in HCFs and HKCs.
